# Supplementary material
Source: PubMed Central journal article supplement (PMC3635145)
Supplement: NIHMS451823-supplement-1_si_001.pdf [file NIHMS451823-supplement-1_si_001.pdf]

# Supporting Information

## Discovery of novel *Trypanosoma brucei* phosphodiesterase B1 inhibitors by virtual screening against the unliganded TbrPDEB1 crystal structure

*Chimed Jansen,<sup>1,‡</sup> Huanchen Wang,<sup>2,‡</sup> Albert J. Kooistra,<sup>1</sup> Chris de Graaf,<sup>1</sup> Kristina Orrling,<sup>1</sup> Hermann Tenor,<sup>3</sup>  
Thomas Seebeck,<sup>4</sup> David Bailey,<sup>5</sup> Iwan J.P. de Esch,<sup>1</sup> Hengming Ke<sup>2,\*</sup> and Rob Leurs<sup>1,\*</sup>*

<sup>1</sup>Division of Medicinal Chemistry, Faculty of Sciences, Amsterdam Institute of Molecules, Medicines and Systems (AIMMS), VU University Amsterdam, The Netherlands.

<sup>2</sup>Department of Biochemistry and Biophysics, University of North Carolina, Chapel Hill, NC, USA.

<sup>3</sup>Department of Biochemistry, Nycomed GmbH, Konstanz, Germany.

<sup>4</sup>Institute of Cell Biology, University of Bern, Baltzerstrasse 4, 3012 Bern, Switzerland.

<sup>5</sup>IOTA Pharmaceuticals, St. John's Innovation Centre, Cowley Road, Cambridge CB4 0WS, United Kingdom.

## Supporting Information: Table of Contents

|                   |                                                                                                                                         |
|-------------------|-----------------------------------------------------------------------------------------------------------------------------------------|
| <b>Figure S1.</b> | The physical filters as applied to the set of known PDE inhibitors used to select filter ranges for the virtual screening study (p. S3) |
| <b>Figure S2.</b> | Substructure filter applied to the compound library (p. S4)                                                                             |
| <b>Figure S3.</b> | Dose-inhibition curves reference compounds and validated virtual screening hits for TbrPDEB1 and hPDE4 (p. S5)                          |
| <b>Table S1.</b>  | The activity of purchased compounds on TbrPDEB1 and hPDE4 (p. S6 - S9)                                                                  |
| <b>Table S2.</b>  | Purity data and mass identification of purchased compounds (p. S10 - S11)                                                               |
| <b>Table S3.</b>  | Structure databases downloaded from ZINC (p. S12)                                                                                       |
| <b>Table S4.</b>  | The top 50 compounds selected using routes A-D ranked by PLANTS scores (p. S13 - S14)                                                   |
| <b>Table S5.</b>  | Published TbrPDEB1 inhibitors (p. S15 - S18)                                                                                            |
| <b>Table S6.</b>  | Protein-ligand interactions of the docking poses (p. S19 – S21)                                                                         |

## Supplementary Tables and Figures

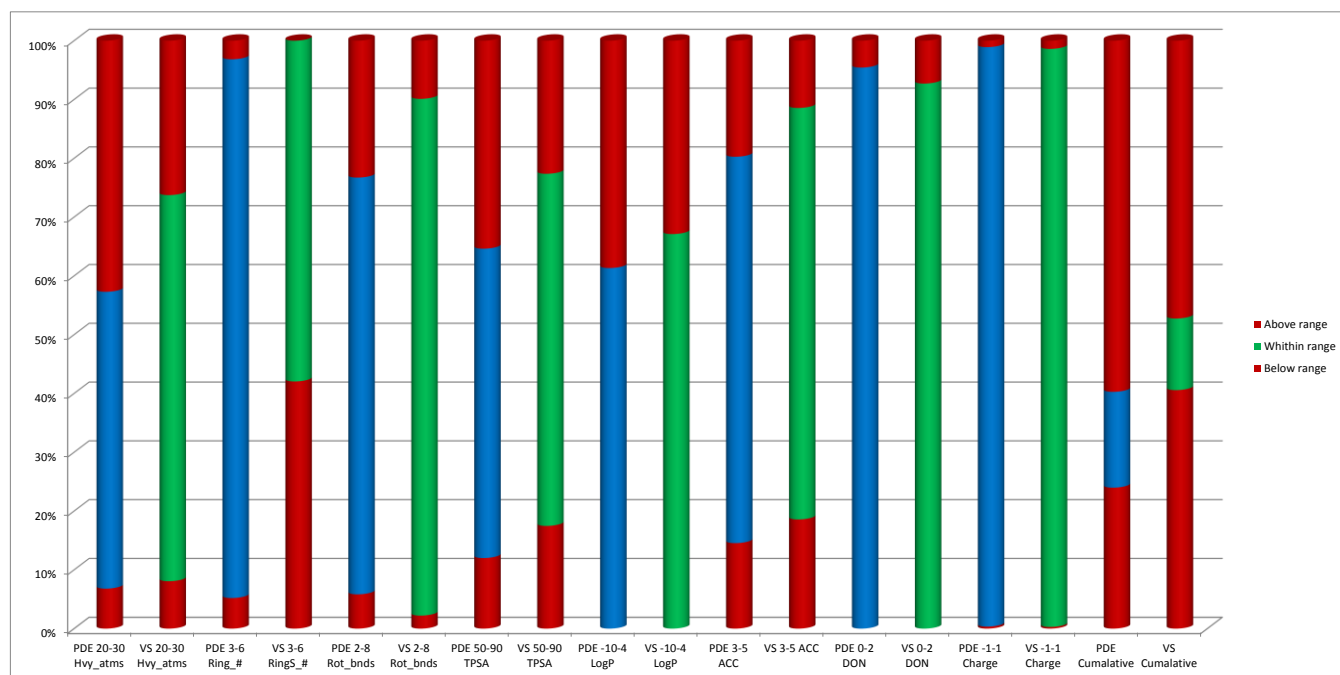

**Figure S1.** The physical filters as applied to the set of known PDE inhibitors used to select filter ranges for the virtual screening study are shown as blue bars (passed filter). The unique ZINC compounds from select suppliers are shown as green bars (passed filter). The red bars indicate compounds which fell above or below the filter range. The final two bars show the cumulative effect of all filters on the original databases.

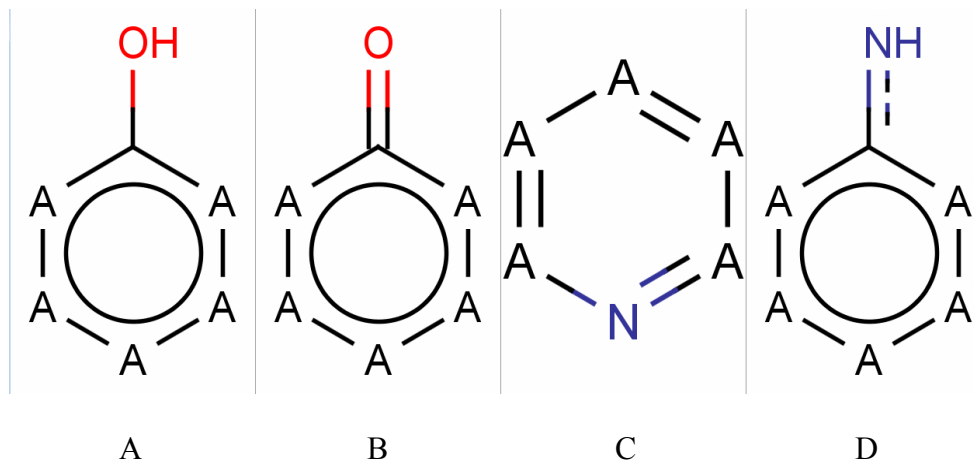

**Figure S2.** Substructure filter applied to the compound library where A is any atomtype. Ligands were required to contain at least one of the four systems, A, B, C or D. Note that the software does not distinguish aromatic rings from conjugated ring systems.

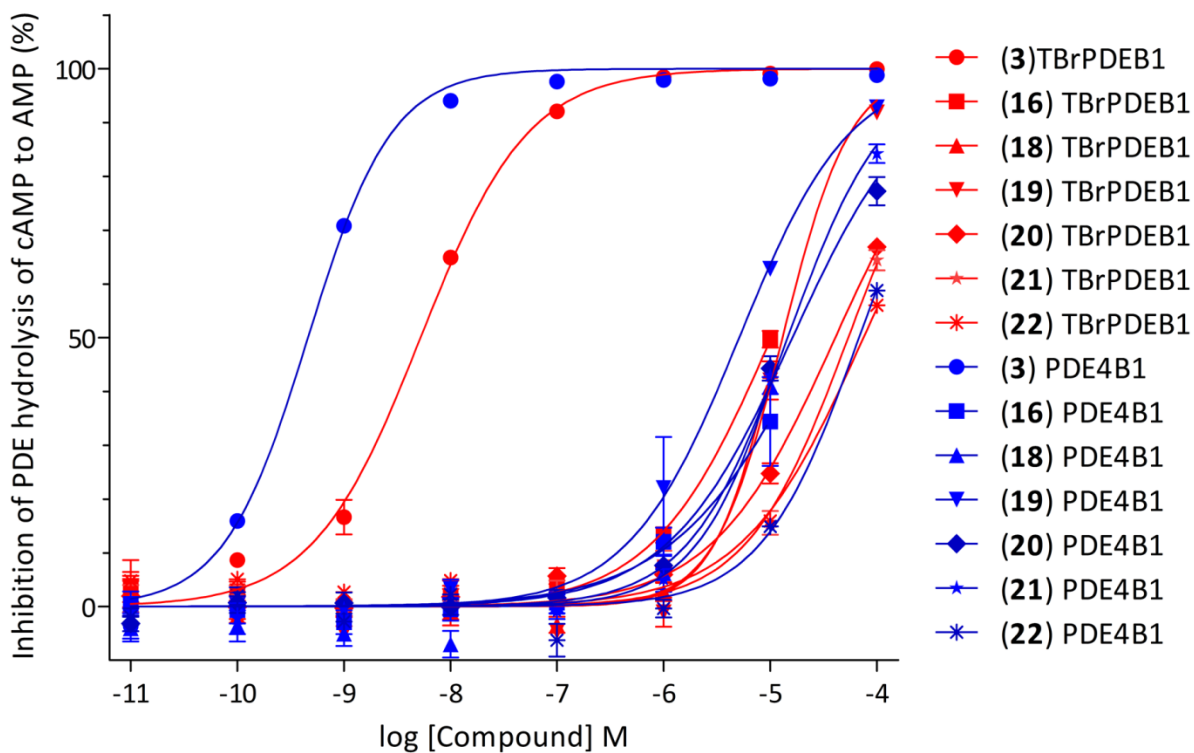

**Figure S3.** Inhibition of the hydrolysis of [ $^3\text{H}$ ]-5'-cAMP to [3H]-5'-AMP by TbrPDEB1 or hPDE4 in the presence of an inhibitor, as measured using SPA yttrium silicate beads in the presence of zinc sulfate. Inhibition data are provided for novel TbrPDEB1 inhibitors **16-22** and compound **3**, used as a reference in this assay. Not all compounds were soluble at concentrations above 10  $\mu\text{M}$ . Short error bars are concealed by the symbols in the graph. For inhibitors, which did not reach 100% inhibition at the highest concentration measured, inhibition curves were fitted to derive  $\text{IC}_{50}$  values with the assumption that the inhibition curves plateau at 100% inhibition, since the inhibitors are expected to bind competitively to the PDE substrate binding pocket.

**Table S1.** The activity of purchased compounds on TbrPDEB1 and hPDE4. Displayed with the virtual screening scores of the binding mode used to select each compound for purchase. The similarity of the structures to known TbrPDEB1 inhibitors is provided.

| cpd | Purchased Compounds                                                                 | TbrPDEB1<br>IC <sub>50</sub> in $\mu$ M | IFP1<br>(rank) | IFP2<br>(rank) | Plants<br>(rank) | ROCS<br>(closest inhibitor) | ECFP4<br>(closest inhibitor) | hPDE4B<br>IC <sub>50</sub> in $\mu$ M |
|-----|-------------------------------------------------------------------------------------|-----------------------------------------|----------------|----------------|------------------|-----------------------------|------------------------------|---------------------------------------|
| 16  | 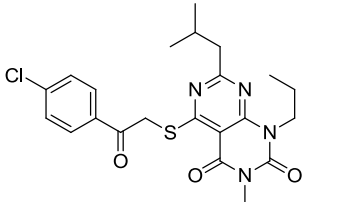   | 10                                      | 0.80           | 0.63           | -102.8           | 1.11<br>(15)                | 0.18<br>(6 - NEU222)         | 26                                    |
| 17  |    |                                         | 0.79<br>(33)   | 0.61           | -94.7            | 1.21<br>(15)                | 0.18<br>(6)                  |                                       |
| 18  |    | 12                                      | 0.75<br>(44)   | 0.70           | -93.8            | 1.07<br>(15)                | 0.20<br>(2/4 - 8d)           | 14                                    |
| 19  |   | 13                                      | 0.53           | 0.75<br>(14)   | -101.3           | 1.02<br>(12)                | 0.21<br>(5)                  | 4.9                                   |
| 20  |  | 40                                      | 0.65           | 0.75<br>(6)    | -103.6           | 0.95<br>(15)                | 0.16<br>(2/4 - 16b)          | 15                                    |
| 21  |  | 60                                      | 0.75<br>(24)   | 0.63           | -95.3            | 1.10<br>(6 - NEU227)        | 0.24<br>(2/4 - 8d)           | 15                                    |
| 22  |  | 78                                      | 0.45           | 0.55           | -109.1<br>(9)    | 0.92<br>(2/4 - 13b)         | 0.21<br>(6 - NEU432)         | 71                                    |
| 23  |  | >100                                    | 0.75<br>(66)   | 0.70           | -92.9            | 1.23<br>(6 - NEU432)        | 0.16<br>(6)                  | 4                                     |
| 24  |  | >100                                    | 0.75<br>(28)   | 0.67           | -94.9            | 1.03<br>(14)                | 0.30<br>(6 - NEU222)         | 6                                     |

|                 |                                                                                     |      |                     |                     |                       |                      |                      |      |
|-----------------|-------------------------------------------------------------------------------------|------|---------------------|---------------------|-----------------------|----------------------|----------------------|------|
| 25              | 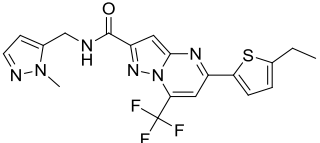   | >100 | 0.65                | <b>0.75</b><br>(22) | -100.6                | 1.10<br>(6 – NEU227) | 0.22<br>(14)         | 10   |
| 26              |    | >100 | 0.69                | 0.78<br>(75)        | -97.7                 | 1.03<br>(2/4 – 15a)  | 0.22<br>(2/4 – 15a)  | 28   |
| 27              |    | >100 | 0.65                | 0.75<br>(508)       | -91.0                 | 1.08<br>(6 – NEU432) | 0.14<br>(10)         | 34   |
| 28              |    | >100 | 0.71                | 0.52                | -97.2                 | 1.00<br>(14 – 26a)   | 0.15<br>(9)          | 50   |
| 29 <sup>a</sup> |    | >100 | 0.5                 | 0.50                | -107.7 <sup>b</sup>   | 1.09<br>(6 – NEU227) | 0.25<br>(5)          | 56   |
| 30              |    | >100 | 0.59                | 0.60                | -100.6                | 1.03<br>(6 – NEU227) | 0.22<br>(2/4 – 8d)   | 74   |
| 31              |  | >100 |                     |                     |                       | 1.17<br>(2/4 – 14a)  | 0.25<br>(2/4 – 15a)  | 94   |
| 32              |  |      | 0.63                | 0.42                | <b>-106.6</b><br>(39) | 1.01<br>(2/4 - 8b)   | 0.20<br>(6 – NEU227) |      |
| 33 <sup>a</sup> |  | >100 | <b>0.75</b><br>(16) | 0.67                | -96.8                 | 1.17<br>(2/4 - 6b)   | 0.17<br>(3)          | >100 |
| 34 <sup>a</sup> |  | >100 | <b>0.77</b><br>(27) | 0.48                | -95.1                 | 1.00<br>(2/4 - 8b)   | 0.22<br>(2/4 – 8d)   | >100 |
| 35              |  | >100 | <b>0.86</b><br>(36) | 0.54                | -94.4                 | 1.07<br>(6 – NEU227) | 0.18<br>(2/4 – 18b)  | >100 |

|                 |  |      |                     |                    |                       |                     |                      |      |
|-----------------|--|------|---------------------|--------------------|-----------------------|---------------------|----------------------|------|
| 36              |  | >100 | <b>0.77</b><br>(39) | 0.42               | -94.1                 | 1.01<br>(6)         | 0.17<br>(14 - 7)     | >100 |
| 37              |  | >100 | <b>0.80</b><br>(48) | 0.58               | -93.5                 | 1.10<br>(10)        | 0.27<br>(6 - NEU227) | >100 |
| 38 <sup>a</sup> |  | >100 | 0.63                | <b>0.76</b><br>(2) | -104.9                | 1.09<br>(2/4 - 8d)  | 0.20<br>(15)         | >100 |
| 39 <sup>a</sup> |  | >100 | 0.43                | 0.52               | <b>-108.8</b><br>(10) | 1.04<br>(2/4 - 8d)  | 0.20<br>(6)          | >100 |
| 40 <sup>a</sup> |  | >100 | 0.39                | 0.52               | <b>-107.1</b><br>(24) | 0.97<br>(2/4 - 13b) | 0.21<br>(2/4 - 13b)  | >100 |
| 41 <sup>a</sup> |  | >100 | 0.39                | 0.42               | <b>-106.9</b><br>(31) | 0.95<br>(6)         | 0.16<br>(2/4 - 8d)   | >100 |
| 42 <sup>a</sup> |  | >100 | 0.53                | 0.58               | <b>-106.4</b><br>(45) | 0.92<br>(6)         | 0.17<br>(2/4 - 8c)   | >100 |
| 43 <sup>a</sup> |  | >100 | 0.50                | 0.61               | <b>-107.6</b><br>(20) | 1.10<br>(2/4 - 8d)  | 0.19<br>(15)         | >100 |



|           |                                                                                   |      |              |                   |                |                      |                     |      |
|-----------|-----------------------------------------------------------------------------------|------|--------------|-------------------|----------------|----------------------|---------------------|------|
| <b>44</b> | 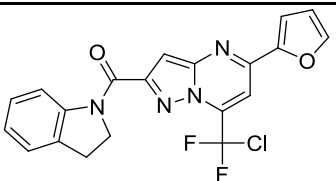  | >100 | 0.67         | 0.75 <sup>b</sup> | -97.2          | 1.09<br>(6 – NEU227) | 0.14<br>(11)        | >100 |
| <b>45</b> |  | >100 | 0.75<br>(82) | 0.58              | -92.1          | 1.10<br>(15)         | 0.20<br>(2/4 – 8b)  | >100 |
| <b>46</b> |  | >100 | 0.56         | 0.50              | -106.5<br>(42) | 0.97<br>(6 – NEU227) | 0.23<br>(2/4 – 20b) | >100 |

<sup>a</sup>All compounds were purchased as racemates and diastereomeric mixtures where chirality was present in the structures.

<sup>b</sup>These compounds were filtered out during the filtering of the Diverse Top 50 sets from the selection routes B and C, they have been included in route D.

**Table S2.** Purity data and mass identification of purchased compounds.

| cpd | ZINC #                           | Supplier | Supplier code | Purity (% by LC-MS) <sup>a</sup> | Recorded M/Z | Exact mass |
|-----|----------------------------------|----------|---------------|----------------------------------|--------------|------------|
| 16  | (Analogue of 17)<br>ZINC14077623 | Enamine  | T5795068      | 96                               | 460.95       | 460.13     |
| 17  | (VS Hit)<br>ZINC04139100         |          |               |                                  |              |            |
| 18  | ZINC09336923                     | Enamine  | T5692782      | 98                               | 399.90       | 399.11     |
| 19  | ZINC05532912                     | Enamine  | T6353379      | 99                               | 405.95       | 405.11     |
| 20  | ZINC12910984                     | Enamine  | T6108077      | 99 <sup>+</sup>                  | 403.00       | 402.16     |
| 21  | ZINC08704885                     | Enamine  | T5794109      | 99                               | 390.05       | 389.21     |
| 22  | ZINC40024665                     | Enamine  | T6555037      | 97                               | 386.00       | 385.19     |
| 23  | ZINC06828559                     | Vitas-M  | STK303337     | 99                               | 387.00       | 386.19     |
| 24  | ZINC08194149                     | Enamine  | T5604160      | 95                               | 420.95       | 420.12     |
| 25  | ZINC02794126                     | Vitas-M  | STK307638     | 95                               | 434.95       | 434.12     |
| 26  | ZINC02803730                     | Vitas-M  | STK309957     | 99                               | 407.90       | 407.10     |
| 27  | ZINC02803366                     | Vitas-M  | STK309884     | 99                               | 372.85       | 372.09     |
| 28  | ZINC04070223                     | Vitas-M  | STK821967     | 95                               | 377.95       | 377.15     |
| 29  | ZINC04784334                     | Vitas-M  | STK214384     | 98                               | 402.00       | 401.16     |
| 30  | ZINC05264706                     | Enamine  | T5332365      | 93 <sup>b</sup>                  | 423.00       | 422.18     |
| 31  | (Analogue of 32)<br>ZINC07201382 | Enamine  | T6367699      | 95                               | 344.90       | 344.08     |
| 32  | (VS Hit)<br>ZINC11398873         |          |               |                                  |              |            |
| 33  | ZINC02789699                     | Vitas-M  | STK306257     | 96                               | 424.95       | 424.09     |
| 34  | ZINC32907350                     | Enamine  | T6378025      | 95                               | 415.00       | 414.16     |
| 35  | ZINC06756443                     | Vitas-M  | STK605276     | 99 <sup>+</sup>                  | 425.95       | 425.18     |
| 36  | ZINC00978529                     | Vitas-M  | STK860151     | 99                               | 386.00       | 385.10     |
| 37  | ZINC20735167                     | Vitas-M  | STK644500     | 98                               | 418.95       | 418.11     |
| 38  | ZINC05274263                     | Vitas-M  | STK871199     | 98                               | 401.05       | 400.19     |
| 39  | ZINC40071327                     | Enamine  | T6550918      | 95                               | 425.05       | 424.20     |
| 40  | ZINC48309056                     | Enamine  | T6644883      | 97                               | 405.05       | 404.22     |
| 41  | ZINC02343899                     | Vitas-M  | STK852257     | 99                               | 397.95       | 397.13     |
| 42  | ZINC12270605                     | Enamine  | T6031050      | 97                               | 405.90       | 405.11     |
| 43  | ZINC18223039                     | Vitas-M  | STK235219     | 98                               | 404.00       | 403.18     |
| 44  | ZINC02503785                     | Vitas-M  | STK768883     | 98                               | 414.95       | 414.07     |
| 45  | ZINC09634941                     | Enamine  | T5481576      | 96                               | 453.90       | 453.03     |
| 46  | ZINC32679558                     | Enamine  | T6273443      | 99                               | 413.95       | 413.15     |

<sup>a</sup> Analytical HPLC-MS analyses were conducted using a Shimadzu LC-20AD liquid

chromatograph pump system with a Shimadzu SPD-M20A diode array detector. MS detection

was performed with a Shimadzu LCMS-2010 EV liquid chromatograph mass spectrometer.

The analyses were performed using the following conditions; Xbridge (C18) 5  $\mu\text{m}$  column (50 mm  $\times$  4.6 mm) with solvent A (acetonitrile with 0.1% formic acid) and B (water with 0.1% formic acid), flow rate of 1.0 mL/min, start 5% A, linear gradient to 90% A in 4.5 min, then 1.5 min at 90% A, then a linear gradient to 5% A in 0.5 min, then 1.5 min at 5% A, total run time of 8.0 min. Compound purities were calculated as the percentage peak area of the analyzed compound by UV detection at 230 nm.

<sup>b</sup> This compound was reported to be 95% pure according to the supplier Enamine.

**Table S3.** Structure databases downloaded from ZINC.

| <b>Companies</b>                |
|---------------------------------|
| Acros                           |
| Apollo                          |
| Asinex                          |
| Chembridge                      |
| Chembridge BB (building blocks) |
| Enamine <sup>a</sup>            |
| Enamine BB                      |
| Fluorochem                      |
| IBScreen                        |
| IBScreen BB                     |
| IBScreen drugs                  |
| Labotest                        |
| Labotest BB                     |
| Matrix                          |
| Maybridge                       |
| Maybridge BB                    |
| Sigma-Aldrich                   |
| Specs                           |
| Specs BB                        |
| Timtec                          |
| Timtec BB                       |
| VitasM <sup>a</sup>             |
| VitasM BB                       |

<sup>a</sup> Compounds were eventually purchased from just Enamine and VitasM due to the number of compounds in the final selection sets available from these companies.

**Table S4.** The top 50 diverse compounds selected using routes A-D ranked by PLANTS scores.

| PLANTS score rank | IFP1 Diverse Top 50 | IFP2 Diverse Top 50 | PLANTS Diverse Top 50 | Visual Top 50     |
|-------------------|---------------------|---------------------|-----------------------|-------------------|
| 1                 | ZINC04859189        | ZINC44427189        | ZINC35702500          | ZINC10256687      |
| 2                 | ZINC07341961        | ZINC05274263 (38)   | ZINC10654376          | ZINC04784334 (29) |
| 3                 | ZINC40049185        | ZINC20589454        | ZINC10256761          | ZINC44426989      |
| 4                 | ZINC02302046        | ZINC07985044        | ZINC32854262          | ZINC34756294      |
| 5                 | ZINC05369829        | ZINC18223137        | ZINC04940098          | ZINC35435996      |
| 6                 | ZINC07007212        | ZINC12910984 (20)   | ZINC26404382          | ZINC05264706 (30) |
| 7                 | ZINC19286607        | ZINC11969980        | ZINC36059048          | ZINC11953787      |
| 8                 | ZINC32754938        | ZINC20589325        | ZINC44427179          | ZINC13082922      |
| 9                 | ZINC00825537        | ZINC12050083        | ZINC40024665 (22)     | ZINC33451317      |
| 10                | ZINC05626395        | ZINC55099474        | ZINC40071327 (39)     | ZINC12975890      |
| 11                | ZINC24055184        | ZINC20589507        | ZINC14883991          | ZINC09410355      |
| 12                | ZINC35919898        | ZINC04816090        | ZINC19136671          | ZINC13626803      |
| 13                | ZINC18194984        | ZINC38530038        | ZINC34738807          | ZINC09634941 (45) |
| 14                | ZINC00969099        | ZINC05532912 (19)   | ZINC11937966          | ZINC06710214      |
| 15                | ZINC04420715        | ZINC23316779        | ZINC38531189          | ZINC06828559 (23) |
| 16                | ZINC02789699 (33)   | ZINC14733669        | ZINC20599963          | ZINC02803730 (26) |
| 17                | ZINC25150965        | ZINC12373726        | ZINC44920958          | ZINC00931312      |
| 18                | ZINC12145740        | ZINC12436366        | ZINC05354996          | ZINC12606885      |
| 19                | ZINC55344232        | ZINC19459711        | ZINC11874105          | ZINC02503785 (44) |
| 20                | ZINC32754134        | ZINC12148703        | ZINC18223039 (43)     | ZINC04070223 (28) |
| 21                | ZINC09409634        | ZINC12145452        | ZINC36062296          | ZINC12442274      |
| 22                | ZINC31807311        | ZINC02794126 (25)   | ZINC25812935          | ZINC58186226      |
| 23                | ZINC19574501        | ZINC35769460        | ZINC19520544          | ZINC13082899      |
| 24                | ZINC08704885 (21)   | ZINC15070214        | ZINC48309056 (40)     | ZINC07201382      |
| 25                | ZINC20602439        | ZINC37396949        | ZINC11937720          | ZINC07625095      |
| 26                | ZINC20455928        | ZINC05274303        | ZINC35702460          | ZINC01140858      |
| 27                | ZINC32907350 (34)   | ZINC07105645        | ZINC23382374          | ZINC35895715      |
| 28                | ZINC08194149 (24)   | ZINC44200937        | ZINC14979951          | ZINC17207060      |
| 29                | ZINC10913577        | ZINC09135087        | ZINC04250137          | ZINC11973006      |
| 30                | ZINC35958590        | ZINC02326460        | ZINC44428673          | ZINC22322128      |
| 31                | ZINC00918167        | ZINC09699404        | ZINC02343899 (41)     | ZINC24427178      |
| 32                | ZINC08395277        | ZINC12206356        | ZINC36740043          | ZINC08015074      |
| 33                | ZINC04139100 (17)   | ZINC06834043        | ZINC38530049          | ZINC19626952      |
| 34                | ZINC16524521        | ZINC11753735        | ZINC18223137          | ZINC11665980      |
| 35                | ZINC19839878        | ZINC58225567        | ZINC34739521          | ZINC44440630      |
| 36                | ZINC06756443 (35)   | ZINC36621353        | ZINC32908432          | ZINC19524964      |
| 37                | ZINC32815479        | ZINC35819779        | ZINC04924922          | ZINC04859238      |
| 38                | ZINC12192368        | ZINC12116467        | ZINC40135218          | ZINC04898188      |
| 39                | ZINC00978529 (36)   | ZINC12449018        | ZINC11398873 (31)     | ZINC04859129      |
| 40                | ZINC04162297        | ZINC14953639        | ZINC14749896          | ZINC09517533      |
| 41                | ZINC12508767        | ZINC35702601        | ZINC09731579          | ZINC34711584      |
| 42                | ZINC04272446        | ZINC24082910        | ZINC32679558 (46)     | ZINC13284516      |
| 43                | ZINC09522374        | ZINC23427858        | ZINC35556172          | ZINC04375111      |

|    |                          |              |                          |                          |
|----|--------------------------|--------------|--------------------------|--------------------------|
| 44 | ZINC09336923 <b>(18)</b> | ZINC20591464 | ZINC24754510             | ZINC05215818             |
| 45 | ZINC32930758             | ZINC12653560 | ZINC12270605 <b>(42)</b> | ZINC35842211             |
| 46 | ZINC20920532             | ZINC20602438 | ZINC12185356             | ZINC12233593             |
| 47 | ZINC00674064             | ZINC47013587 | ZINC24479982             | ZINC34915770             |
| 48 | ZINC20735167 <b>(37)</b> | ZINC20602481 | ZINC36058970             | ZINC02803366 <b>(27)</b> |
| 49 | ZINC02793272             | ZINC15597290 | ZINC49586919             | ZINC01350577             |
| 50 | ZINC12652768             | ZINC38530026 | ZINC08664904             | ZINC52686128             |

**Table S5.** Published TbrPDEB1 inhibitors. Only inhibitors with IC<sub>50</sub> values under 100μM were included, single point measurements were accepted where inhibition was over 50% at 10μM or at 100μM. Compound structures are shown with their number, name as published, IC<sub>50</sub> value in μM or percent inhibition for TbrPDEB1 and the human PDE for which they are most potent according to literature, and PLANTS docking scores.

| Compound | Name in source                                              | Structure                                                                           | TbrPDEB1<br>IC <sub>50</sub> in μM | Human PDE<br>IC <sub>50</sub> in μM | TbrPDEB1<br>PLANTS |
|----------|-------------------------------------------------------------|-------------------------------------------------------------------------------------|------------------------------------|-------------------------------------|--------------------|
| 1        | VUF11851                                                    | 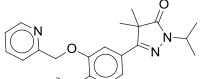   | 2.5 <sup>1</sup>                   |                                     | -85                |
| 2        | VUF13525                                                    |    | 0.4 <sup>1</sup>                   |                                     | -91                |
| 3        | PPS54019                                                    |    | 0.004 <sup>2</sup>                 | 0.0006 <sup>2, b</sup>              | -104               |
| 4        | piclamilast                                                 |    | 4.7 <sup>3</sup>                   | 0.001 <sup>4, b</sup>               | -69                |
| 5        | 1-(3-(4-hydroxybutoxy)-4-methoxyphenyl)-3-methylbutan-1-one |   | 4.6 <sup>5</sup>                   |                                     | -75                |
| 48       | 6a                                                          |  | 12 <sup>1</sup>                    |                                     | -73                |
| 49       | 6b                                                          |  | 0.41 <sup>1</sup>                  |                                     | -84                |
| 50       | 8a                                                          |  | 6.3 <sup>1</sup>                   |                                     | -77                |
| 51       | 8b                                                          |  | 10 <sup>1</sup>                    |                                     | -86                |
| 52       | 8c                                                          |  | 1.0 <sup>1</sup>                   |                                     | -87                |
| 53       | 8d                                                          |  | 0.5 <sup>1</sup>                   |                                     | -91                |
| 54       | 9c                                                          |  | 2.0 <sup>1</sup>                   |                                     | -75                |
| 55       | 10c                                                         |  | 2.5 <sup>1</sup>                   |                                     | -76                |

|    |              |  |                    |                        |      |
|----|--------------|--|--------------------|------------------------|------|
| 56 | 13a          |  | 2.0 <sup>1</sup>   |                        | -88  |
| 57 | 13b          |  | 1.0 <sup>1</sup>   |                        | -89  |
| 58 | 14a          |  | 2.0 <sup>1</sup>   |                        | -87  |
| 59 | 14b          |  | 0.79 <sup>1</sup>  |                        | -95  |
| 60 | 15a          |  | 0.83 <sup>1</sup>  |                        | -91  |
| 61 | 15b          |  | 0.63 <sup>1</sup>  |                        | -98  |
| 62 | 16a          |  | 0.79 <sup>1</sup>  |                        | -89  |
| 63 | 16b          |  | 0.25 <sup>1</sup>  |                        | -99  |
| 64 | 17b          |  | 0.50 <sup>1</sup>  |                        | -92  |
| 65 | 18a          |  | 5.0 <sup>1</sup>   |                        | -84  |
| 66 | 18b          |  | 0.63 <sup>1</sup>  |                        | -90  |
| 67 | 19b          |  | 5.0 <sup>1</sup>   |                        | -91  |
| 68 | 19b          |  | 0.16 <sup>1</sup>  |                        | -103 |
| 69 | 19a          |  | 0.40 <sup>1</sup>  |                        | -91  |
| 70 | 20b          |  | 0.049 <sup>1</sup> | 0.0012 <sup>1, b</sup> | -95  |
| 71 | etazolate    |  | 31 <sup>6</sup>    | 1.1 <sup>7, b</sup>    | -71  |
| 72 | dipyridamole |  | 15 <sup>6</sup>    | 0.4 <sup>8, d</sup>    | -88  |



|    |             |  |                                |                          |     |
|----|-------------|--|--------------------------------|--------------------------|-----|
| 73 | GSK256066   |  | 53% inh/10 $\mu\text{M}^3$     | 0.000003 <sup>9, b</sup> | -77 |
| 74 | L-454560    |  | 8.8 <sup>3</sup>               | 0.0005 <sup>10, b</sup>  | -70 |
| 75 | trequinsin  |  | 13 <sup>6</sup>                | 0.4 <sup>11, b</sup>     | -75 |
| 76 | sildenafil  |  | 42 <sup>6</sup>                | 0.01 <sup>12, c</sup>    | -95 |
| 77 | 7           |  | 71% inh/100 $\mu\text{M}^{13}$ |                          | -87 |
| 78 | 26c         |  | 77% inh/100 $\mu\text{M}^{13}$ |                          | -75 |
| 79 | 24a         |  | 72% inh/100 $\mu\text{M}^{13}$ |                          | -74 |
| 80 | 26a         |  | 54% inh/100 $\mu\text{M}^{13}$ |                          | -76 |
| 81 | PFE-PDE10-2 |  | 55% inh/100 $\mu\text{M}^3$    | 0.004 <sup>14, e</sup>   | -81 |
| 82 | NEU432      |  | 17 <sup>3</sup>                |                          | -63 |
| 83 | NEU222      |  | 14 <sup>3</sup>                |                          | -65 |
| 84 | NEU230      |  | 8 <sup>3</sup>                 |                          | -71 |
| 85 | NEU227      |  | 13 <sup>3</sup>                |                          | -75 |

|    |            |                                                                                   |                                        |                        |      |
|----|------------|-----------------------------------------------------------------------------------|----------------------------------------|------------------------|------|
| 86 | ethaverine | 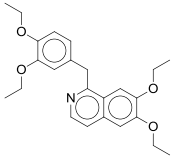 | 27 <sup>6</sup>                        | 0.4 <sup>15, b</sup>   | -89  |
| 87 | papaverine |  | 30 <sup>16</sup>                       | 1.1 <sup>15, b</sup>   | -88  |
| 88 | 8-Br-cAMP  |  | 37 <sup>17</sup>                       | 14 <sup>18, a</sup>    | -82  |
| 89 | 8-CPT-cAMP |  | 1.2 <sup>17</sup>                      | 0.9 <sup>18, c</sup>   | -94  |
| 90 | tadalafil  |  | 72% inh/10 $\mu\text{M}$ <sup>19</sup> | 0.001 <sup>20, c</sup> | -103 |

<sup>a</sup> hpDE3 IC<sub>50</sub> value, <sup>b</sup> hpDE4 IC<sub>50</sub> value, <sup>c</sup> hpDE5 IC<sub>50</sub> value, <sup>d</sup> hpDE6 IC<sub>50</sub> value, <sup>e</sup> hpDE10 IC<sub>50</sub> value

**Table S6.** Protein-ligand interactions of the docking poses of the reference compounds and those used to select novel inhibitors. The IFPs are encoded as seven bits per residue as follows: 1. Apolar; 2. Aromatic face-to-face; 3. Aromatic edge-to-face; 4. H-bond donor (protein) – H-bond acceptor (ligand); 5. H-bond donor (ligand) – H-bond acceptor (protein); 6. Ionic interaction positive (protein) – negative (ligand); 7. Ionic interaction positive (ligand) – negative (protein).

| Compd | TYR668 | HIS669 | HIS673 | HIS709 | ASP710 | HIS713 | LEU716 |
|-------|--------|--------|--------|--------|--------|--------|--------|
| 1     | 0      | 0      | 0      | 0      | 0      | 0      | 0      |
| 2     | 1      | 0      | 0      | 0      | 0      | 0      | 0      |
| 16    | 0      | 0      | 0      | 0      | 0      | 0      | 0      |
| 17    | 0      | 0      | 0      | 0      | 0      | 0      | 0      |
| 18    | 0      | 0      | 0      | 0      | 0      | 0      | 0      |
| 19    | 1      | 0      | 0      | 0      | 0      | 0      | 0      |
| 20    | 0      | 0      | 0      | 0      | 0      | 0      | 0      |
| 21    | 0      | 0      | 0      | 0      | 0      | 0      | 0      |
| 22    | 1      | 0      | 1      | 0      | 0      | 0      | 0      |
| 23    | 0      | 0      | 0      | 0      | 0      | 0      | 0      |
| 24    | 0      | 0      | 0      | 0      | 0      | 0      | 0      |
| 25    | 0      | 0      | 0      | 0      | 0      | 0      | 0      |
| 26    | 0      | 0      | 0      | 0      | 0      | 0      | 0      |
| 27    | 0      | 0      | 0      | 0      | 0      | 0      | 0      |
| 28    | 0      | 0      | 0      | 0      | 0      | 0      | 0      |
| 29    | 0      | 0      | 0      | 0      | 0      | 0      | 0      |
| 30    | 0      | 0      | 0      | 0      | 0      | 0      | 0      |
| 32    | 0      | 0      | 0      | 0      | 0      | 0      | 0      |

| Compd | ASN717 | ASN718 | SER719 | THR783 | MET785 | ALA786 | GLY789 |
|-------|--------|--------|--------|--------|--------|--------|--------|
| 1     | 0      | 0      | 0      | 0      | 0      | 0      | 0      |
| 2     | 0      | 0      | 0      | 0      | 0      | 0      | 0      |
| 16    | 0      | 0      | 0      | 0      | 0      | 0      | 0      |
| 17    | 0      | 0      | 0      | 0      | 0      | 0      | 0      |
| 18    | 0      | 0      | 0      | 0      | 0      | 0      | 0      |
| 19    | 0      | 0      | 0      | 0      | 0      | 0      | 0      |
| 20    | 0      | 0      | 0      | 0      | 0      | 0      | 0      |
| 21    | 0      | 0      | 0      | 0      | 0      | 0      | 0      |
| 22    | 0      | 0      | 0      | 0      | 0      | 0      | 0      |
| 23    | 0      | 0      | 0      | 0      | 0      | 0      | 0      |
| 24    | 0      | 0      | 0      | 0      | 0      | 0      | 0      |
| 25    | 0      | 0      | 0      | 0      | 0      | 0      | 0      |
| 26    | 0      | 0      | 0      | 0      | 0      | 0      | 0      |
| 27    | 0      | 0      | 0      | 0      | 0      | 0      | 0      |
| 28    | 0      | 0      | 0      | 0      | 0      | 0      | 0      |
| 29    | 0      | 0      | 0      | 0      | 0      | 0      | 0      |
| 30    | 0      | 0      | 0      | 0      | 0      | 0      | 0      |
| 32    | 0      | 0      | 0      | 0      | 0      | 0      | 0      |

| Compd | ASP822  | ILE823  | ASN825  | VAL826  | SER833  | TRP836  | ALA837  |
|-------|---------|---------|---------|---------|---------|---------|---------|
| 1     | 0000000 | 1000000 | 1000000 | 1000000 | 0000000 | 0000000 | 0000000 |
| 2     | 1000000 | 1000000 | 1000000 | 1000000 | 0000000 | 1000000 | 1000000 |
| 16    | 0000000 | 1000000 | 1000000 | 1000000 | 0000000 | 0000000 | 0000000 |
| 17    | 0000000 | 1000000 | 1000000 | 1000000 | 0000000 | 0000000 | 0000000 |
| 18    | 1000000 | 1000000 | 1000000 | 1000000 | 0000000 | 0000000 | 0000000 |
| 19    | 1000000 | 1000000 | 1000000 | 0000000 | 0000000 | 0000000 | 1000000 |
| 20    | 1000000 | 1000000 | 1000000 | 1000000 | 0000000 | 0000000 | 0000000 |
| 21    | 0000000 | 1000000 | 1000000 | 1000000 | 0000000 | 0000000 | 0000000 |
| 22    | 1000100 | 1000000 | 1000000 | 0000000 | 0000000 | 0000000 | 0000000 |
| 23    | 0000000 | 1000000 | 1000000 | 1000000 | 0000000 | 0000000 | 1000000 |
| 24    | 0000000 | 1000000 | 1000000 | 1000000 | 0000000 | 0000000 | 0000000 |
| 25    | 0000000 | 0000000 | 1000000 | 1000000 | 0000000 | 0000000 | 1000000 |
| 26    | 1000000 | 1000000 | 1000000 | 1000000 | 0000000 | 0000000 | 0000000 |
| 27    | 0000000 | 1000000 | 1000000 | 1000000 | 0000000 | 0000000 | 1000000 |
| 28    | 0000000 | 1000000 | 1000000 | 1000000 | 0000000 | 0000000 | 0000000 |
| 29    | 0000000 | 1000000 | 1000000 | 1000000 | 0000000 | 0000000 | 0000000 |
| 30    | 0000000 | 0000000 | 1000000 | 1000000 | 0000000 | 0000000 | 0000000 |
| 32    | 0000000 | 0000000 | 1000000 | 1000000 | 0000000 | 0000000 | 0000000 |

| Compd | VAL840  | THR841  | GLU843  | PHE844  | TYR845  | LEU859  | PRO860  |
|-------|---------|---------|---------|---------|---------|---------|---------|
| 1     | 1000000 | 0000000 | 0000000 | 1000000 | 0000000 | 0000000 | 0000000 |
| 2     | 1000000 | 1000000 | 0000000 | 0000000 | 1011000 | 0000000 | 0000000 |
| 16    | 1000000 | 1000000 | 0000000 | 1010000 | 1000000 | 0000000 | 0000000 |
| 17    | 1000000 | 1000000 | 0000000 | 1000000 | 1000000 | 0000000 | 0000000 |
| 18    | 1000000 | 1000000 | 0000000 | 1000000 | 0000000 | 0000000 | 0000000 |
| 19    | 1000000 | 1000000 | 0000000 | 1000000 | 1001000 | 0000000 | 0000000 |
| 20    | 1000000 | 1001000 | 0000000 | 1000000 | 1011000 | 0000000 | 0000000 |
| 21    | 1000000 | 1000000 | 0000000 | 1010000 | 0000000 | 0000000 | 0000000 |
| 22    | 1000000 | 1001000 | 0000000 | 1010000 | 1011000 | 0000000 | 0000000 |
| 23    | 1000000 | 1000000 | 0000000 | 1000000 | 0000000 | 0000000 | 0000000 |
| 24    | 1000000 | 1000000 | 0000000 | 1010000 | 1000000 | 0000000 | 0000000 |
| 25    | 1000000 | 1000000 | 0000000 | 1010000 | 1011000 | 0000000 | 0000000 |
| 26    | 1000000 | 1000000 | 0000000 | 1000000 | 1011000 | 0000000 | 0000000 |
| 27    | 1000000 | 1000000 | 0000000 | 1010000 | 1011000 | 0000000 | 0000000 |
| 28    | 1000000 | 0000000 | 0000000 | 1000000 | 0000000 | 0000000 | 0000000 |
| 29    | 1000000 | 0000000 | 0000000 | 0000000 | 1000000 | 0000000 | 0000000 |
| 30    | 1000000 | 1000000 | 0000000 | 1010000 | 1001000 | 0000000 | 0000000 |
| 32    | 1000000 | 0001000 | 0000000 | 1000000 | 0000000 | 0000000 | 0000000 |



## References

- (1) Orrling, K. M.; Jansen, C.; Vu, X. L.; Balmer, V.; Bregy, P.; Shanmugham, A.; England, P.; Cos, P.; Maes, L.; Adams, E.; van de Bogaart, E.; Chatelain, E.; Ioset, J.-R.; Stolpe, A.; Zorg, S.; Veerman, J.; Seebeck, T.; Sterk, G. J.; de Esch, I. J. P.; Leurs, R., Catechol Pyrazolinones as Trypanocidals: Fragment-Based Design, Synthesis and Pharmacological Evaluation of Nanomolar Inhibitors of Trypanosomal Phosphodiesterase B1. *J. Med. Chem.* **2012**.
- (2) de Koning, H. P.; Gould, M. K.; Sterk, G. J.; Tenor, H.; Kunz, S.; Luginbuehl, E.; Seebeck, T., Pharmacological Validation of *Trypanosoma brucei* Phosphodiesterases as Novel Drug Targets. *J. Infect. Dis.* **2012**, *206*, 229-237.
- (3) Bland, N. D.; Wang, C.; Tallman, C.; Gustafson, A. E.; Wang, Z.; Ashton, T. D.; Ochiana, S. O.; McAllister, G.; Cotter, K.; Fang, A. P.; Gechijian, L.; Garceau, N.; Gangurde, R.; Ortenberg, R.; Ondrechen, M. J.; Campbell, R. K.; Pollastri, M. P., Pharmacological Validation of *Trypanosoma brucei* Phosphodiesterases B1 and B2 as Druggable Targets for African Sleeping Sickness. *J. Med. Chem.* **2011**, *54*, 8188-8194.
- (4) Napoletano, M.; Norcini, G.; Pellacini, F.; Marchini, F.; Morazzoni, G.; Fattori, R.; Ferlenga, P.; Pradella, L., Phthalazine PDE4 inhibitors. Part 3: The synthesis and in vitro evaluation of derivatives with a hydrogen bond acceptor. *Bioorg. Med. Chem. Lett.* **2002**, *12*, 5-8.
- (5) Seebeck, T.; Sterk, G. J.; Ke, H., Phosphodiesterase inhibitors as a new generation of antiprotozoan drugs: exploiting the benefit of enzymes that are highly conserved between host and parasite. *Future Med. Chem.* **2011**, *3*, 1289-1306.
- (6) Zoraghi, R.; Seebeck, T., The cAMP-specific phosphodiesterase TbPDE2C is an essential enzyme in bloodstream form *Trypanosoma brucei*. *Proc. Natl. Acad. Sci. U.S.A.* **2002**, *99*, 4343-4348.
- (7) Wang, H.; Liu, Y.; Chen, Y.; Robinson, H.; Ke, H., Multiple Elements Jointly Determine Inhibitor Selectivity of Cyclic Nucleotide Phosphodiesterases 4 and 7. *J. Biol. Chem.* **2005**, *280*, 30949-30955.

- (8) Fawcett, L.; Baxendale, R.; Stacey, P.; McGrouther, C.; Harrow, I.; Soderling, S.; Hetman, J.; Beavo, J. A.; Phillips, S. C., Molecular cloning and characterization of a distinct human phosphodiesterase gene family: PDE11A. *Proc. Natl. Acad. Sci. U.S.A.* **2000**, *97*, 3702-3707.
- (9) Tralau-Stewart, C. J.; Williamson, R. A.; Nials, A. T.; Gascoigne, M.; Dawson, J.; Hart, G. J.; Angell, A. D. R.; Solanke, Y. E.; Lucas, F. S.; Wiseman, J.; Ward, P.; Ranshaw, L. E.; Knowles, R. G., GSK256066, an Exceptionally High-Affinity and Selective Inhibitor of Phosphodiesterase 4 Suitable for Administration by Inhalation: In Vitro, Kinetic, and In Vivo Characterization. *J. Pharmacol. Exp. Ther.* **2011**, *337*, 145-154.
- (10) Aspiotis, R.; Deschênes, D.; Dubé, D.; Girard, Y.; Huang, Z.; Laliberté, F.; Liu, S.; Papp, R.; Nicholson, D. W.; Young, R. N., The discovery and synthesis of highly potent subtype selective phosphodiesterase 4D inhibitors. *Bioorg. Med. Chem. Lett.* **2010**, *20*, 5502-5505.
- (11) Marivet, M. C.; Bourguignon, J. J.; Lugnier, C.; Mann, A.; Stoclet, J. C.; Wermuth, C. G., Inhibition of cyclic adenosine-3',5'-monophosphate phosphodiesterase from vascular smooth muscle by rolipram analogs. *J. Med. Chem.* **1989**, *32*, 1450-1457.
- (12) Kempson, J.; Pitts, W. J.; Barbosa, J.; Guo, J.; Omotoso, O.; Watson, A.; Stebbins, K.; Starling, G. C.; Dodd, J. H.; Barrish, J. C.; Felix, R.; Fischer, K., Fused pyrimidine based inhibitors of phosphodiesterase 7 (PDE7): synthesis and initial structure–activity relationships. *Bioorg. Med. Chem. Lett.* **2005**, *15*, 1829-1833.
- (13) Wang, C.; Ashton, T. D.; Gustafson, A.; Bland, N. D.; Ochiana, S. O.; Campbell, R. K.; Pollastri, M. P., Synthesis and evaluation of human phosphodiesterases (PDE) 5 inhibitor analogs as trypanosomal PDE inhibitors. Part 1. Sildenafil analogs. *Bioorg. Med. Chem. Lett.* **2012**, *22*, 2579-2581.
- (14) Chappie, T. A.; Humphrey, J. M.; Allen, M. P.; Estep, K. G.; Fox, C. B.; Lebel, L. A.; Liras, S.; Marr, E. S.; Menniti, F. S.; Pandit, J.; Schmidt, C. J.; Tu, M.; Williams, R. D.; Yang, F. V., Discovery of a Series of 6,7-Dimethoxy-4-pyrrolidylquinazoline PDE10A Inhibitors†. *J. Med. Chem.* **2006**, *50*, 182-185.
- (15) Bihel, F. J. J.; Justiniano, H.; Schmitt, M.; Hellal, M.; Ibrahim, M. A.; Lugnier, C.; Bourguignon, J.-J., New PDE4 inhibitors based on pharmacophoric similarity between papaverine and tofisopam. *Bioorg. Med. Chem. Lett.* **2011**, *21*, 6567-6572.

- (16) Kunz, S.; Kloeckner, T.; Essen, L.-O.; Seebeck, T.; Boshart, M., TbPDE1, a novel class I phosphodiesterase of *Trypanosoma brucei*. *Eur. J. Biochem.* **2004**, *271*, 637-647.
- (17) Oberholzer, M.; Marti, G.; Baresic, M.; Kunz, S.; Hemphill, A.; Seebeck, T., The *Trypanosoma brucei* cAMP phosphodiesterases TbrPDEB1 and TbrPDEB2: flagellar enzymes that are essential for parasite virulence. *FASEB J.* **2007**, *21*, 720-731.
- (18) Connolly, B. J.; Willits, P. B.; Warrington, B. H.; Murray, K. J., 8-(4-Chlorophenyl)thio-cyclic AMP is a potent inhibitor of the cyclic GMP-specific phosphodiesterase (PDE VA). *Biochem. Pharmacol.* **1992**, *44*, 2303-2306.
- (19) Ochiana, S. O.; Gustafson, A.; Bland, N. D.; Wang, C.; Russo, M. J.; Campbell, R. K.; Pollastri, M. P., Synthesis and evaluation of human phosphodiesterases (PDE) 5 inhibitor analogs as trypanosomal PDE inhibitors. Part 2. Tadalafil analogs. *Bioorg. Med. Chem. Lett.* **2012**, *22*, 2582-2584.
- (20) Yu, G.; Mason, H.; Wu, X.; Wang, J.; Chong, S.; Beyer, B.; Henwood, A.; Pongrac, R.; Seliger, L.; He, B.; Normandin, D.; Ferrer, P.; Zhang, R.; Adam, L.; Humphrey, W. G.; Krupinski, J.; Macor, J. E., Substituted Pyrazolopyridopyridazines as Orally Bioavailable Potent and Selective PDE5 Inhibitors: Potential Agents for Treatment of Erectile Dysfunction. *J. Med. Chem.* **2003**, *46*, 457-460.
